# Supplementary material
Source: PubMed Central journal article supplement (PMC6287506)
Supplement: jc-15-1966.pdf [file jc-15-1966.pdf]

**Supplemental Table 1. Clinical characteristics of patients with T2DM and normal ALT divided in No-NASH and NASH.**

|                                       | <b>No-NASH<br/>(n=16)</b> | <b>NASH<br/>(n=21)</b> | <b><i>p</i></b> |
|---------------------------------------|---------------------------|------------------------|-----------------|
| <b>Age (years)</b>                    | 63±8                      | 59±7                   | .15             |
| <b>Gender (male)</b>                  | 94%                       | 67%                    | .10             |
| <b>Ethnicity</b>                      |                           |                        | .37             |
| <b>Hispanics</b>                      | 44%                       | 48%                    |                 |
| <b>Caucasians</b>                     | 44%                       | 52%                    |                 |
| <b>African Americans</b>              | 12%                       | 0%                     |                 |
| <b>Asians</b>                         | 0%                        | 0%                     |                 |
| <b>BMI (kg/m<sup>2</sup>)</b>         | 33.3±5.2                  | 35.1±4.6               | .26             |
| <b>Total body fat, %</b>              | 34±8%                     | 38±8%                  | .25             |
| <b>Plasma AST (IU/L)</b>              | 22(17-30)                 | 23(20-26)              | .80             |
| <b>Plasma ALT (IU/L)</b>              | 23(17-35)                 | 28(23 -32)             | .67             |
| <b>Duration of T2DM (years)</b>       | 8 (4-10)                  | 7 (5-12)               | .97             |
| <b>A<sub>1c</sub></b>                 | 6.8 (6.4-7.8)             | 7.4 (6.6-8.2)          | .32             |
| <b>Fasting plasma glucose (mg/dl)</b> | 148 (115-169)             | 130 (115-170)          | .54             |
| <b>HOMA-IR</b>                        | 4.6(1.9-5.3)              | 2.9( 2.0-5.4)          | .67             |
| <b>Treatment</b>                      |                           |                        |                 |
| <b>Metformin</b>                      | 83%                       | 81%                    | .99             |
| <b>Sulfonylurea</b>                   | 42%                       | 57%                    | .39             |
| <b>Insulin</b>                        | 31%                       | 40%                    | .59             |
| <b>Systolic BP (mmHg)</b>             | 133 (128-136)             | 142 (128-149)          | .20             |
| <b>Diastolic BP (mmHg)</b>            | 77 (69-82)                | 76 (71-82)             | .86             |
| <b>Antihypertensive medications</b>   | 85%                       | 84%                    | .98             |
| <b>Plasma cholesterol (mg/dl)</b>     | 152 (121-174)             | 158 (129-190)          | .56             |
| <b>Plasma triglycerides (mg/dl)</b>   | 108 (83-131)              | 162 (108-277)          | .01             |
| <b>Plasma LDL-C (mg/dl)</b>           | 86 (64-103)               | 78 (67-103)            | .68             |
| <b>Plasma HDL-C (mg/dl)</b>           | 39 (36-44)                | 38 (32-44)             | .42             |
| <b>Statin use</b>                     | 87%                       | 74%                    | .37             |

Continuous variables are expressed as mean ± SD or median (interquartile range) according to their distribution. Categorical variables are expressed as percentage. Abbreviations: AST= Aspartate aminotransferases, ALT= Alanine aminotransferases, T2DM= Type 2 diabetes; HOMA-IR= Homeostasis model assessment; HDL-C= high-density lipoprotein cholesterol; LDL-C= low-density lipoprotein cholesterol.
